# Supplementary material for: In-Depth Characterisation of Real-World Advanced Melanoma Patients Receiving Immunotherapies and/or Targeted Therapies: A Case Series
Source: MDPI journal article supplement (doi:10.3390/cancers14112801), 2022-06-04
Supplement: s1 [file s1]

**Supplementary Table S1. Baseline sociodemographic and clinical characteristics (Frequency, column percentages) of participants with and without longitudinal follow up (Frequency, row percentages).**

| N= 41 (%)                                   |         | No<br>follow up<br>N=13<br>(32%) | Longitudinal<br>Follow up<br>N= 28<br>(68%) |
|---------------------------------------------|---------|----------------------------------|---------------------------------------------|
| <b>Socio-demographic characteristics</b>    |         |                                  |                                             |
| <b>Age<sup>1</sup>:</b>                     |         |                                  |                                             |
| <b>Category</b>                             |         |                                  |                                             |
| ≤65 years                                   | 21 (51) | 8 (38)                           | 13 (62)                                     |
| >65 years                                   | 20 (49) | 5 (25)                           | 15 (75)                                     |
| <b>Gender</b>                               |         |                                  |                                             |
| Male                                        | 26 (63) | 9 (35)                           | 17 (65)                                     |
| Female                                      | 15 (37) | 4 (27)                           | 11 (73)                                     |
| <b>Education</b>                            |         |                                  |                                             |
| High school or less                         | 18 (44) | 6 (33)                           | 12 (67)                                     |
| Post high school qualification              | 23 (56) | 7 (30)                           | 16 (70)                                     |
| <b>Environmental exposure</b>               |         |                                  |                                             |
| <b>Occupations since leaving school</b>     |         |                                  |                                             |
| Mainly Indoors                              | 18 (44) | 5 (28)                           | 13 (72)                                     |
| Mainly Outdoors/ both indoor<br>and outdoor | 23 (56) | 8 (35)                           | 15 (65)                                     |
| <b>Overall sports and leisure activity</b>  |         |                                  |                                             |
| Mainly Indoors/ both indoor<br>and outdoor  | 13 (32) | 3 (23)                           | 10 (77)                                     |
| Mainly Outdoor                              | 28 (68) | 10 (36)                          | 18 (64)                                     |
| <b>Phenotype characteristic</b>             |         |                                  |                                             |
| <b>Naevi Count (&gt;5mm)</b>                |         |                                  |                                             |
| Median (range)                              | -       | -                                | 7 (1-59)                                    |

|                                           |         |         |         |
|-------------------------------------------|---------|---------|---------|
| <b>Natural hair colour at age 21</b>      |         |         |         |
| Red/Auburn/Blonde/Light Brown             | 21 (51) | 5 (24)  | 16 (76) |
| Dark Brown/Black                          | 20 (49) | 8 (40)  | 12 (60) |
| <b>Innate skin colour</b>                 |         |         |         |
| Fair                                      | 31 (76) | 9 (29)  | 22 (71) |
| Medium or olive                           | 10 (24) | 4 (40)  | 6 (60)  |
| <b>Facultative skin colour</b>            |         |         |         |
| Fair                                      | 16 (39) | 3 (19)  | 13 (81) |
| Medium or olive                           | 25 (61) | 10 (40) | 15 (60) |
| <b>Freckling score</b>                    |         |         |         |
| Nil/Mild (0–6)                            | 18 (44) | 5 (28)  | 13 (72) |
| Medium/Severe (7-12)                      | 23 (56) | 8 (35)  | 15 (65) |
| <b>Body mass index (kg/m<sup>2</sup>)</b> |         |         |         |
| Normal ( $\leq 24.9$ ) <sup>2</sup>       | 16 (39) | 5 (31)  | 11 (69) |
| Overweight (25.0-29.9)                    | 10 (24) | 4 (40)  | 6 (60)  |
| Obese ( $\geq 30.0$ )                     | 15 (37) | 4 (27)  | 11 (73) |
| <b>Clinical characteristics</b>           |         |         |         |
| <b>Number of comorbidities</b>            |         |         |         |
| None                                      | 5 (12)  | 2 (40)  | 3 (60)  |
| 1                                         | 10 (25) | 4 (40)  | 6 (60)  |
| 2 or more                                 | 26 (63) | 7 (27)  | 19 (73) |
| <b>Comorbidities<sup>3</sup></b>          |         |         |         |
| Hypertension                              |         |         |         |
| Yes                                       | 14 (34) | 4 (29)  | 10 (71) |
| No                                        | 27 (66) | 9 (33)  | 18 (67) |
| Hypercholesterolemia or hyperlipidemia    |         |         |         |
| Yes                                       | 10 (22) | 2 (20)  | 8 (80)  |
| No                                        | 31 (78) | 11 (35) | 20 (65) |

|                                                                                 |         |         |          |
|---------------------------------------------------------------------------------|---------|---------|----------|
| Cardiovascular disease                                                          |         |         |          |
| Yes                                                                             | 8 (20)  | 2 (25)  | 6 (75)   |
| No                                                                              | 33 (80) | 11 (33) | 22 (67)  |
| Diabetes mellitus                                                               |         |         |          |
| Yes                                                                             | 8 (20)  | 2 (25)  | 6 (75)   |
| No                                                                              | 33 (80) | 11 (33) | 22 (67)  |
| <b>Melanoma history</b>                                                         |         |         |          |
| <b>Number of primary melanomas (n= 39)</b>                                      |         |         |          |
| 1                                                                               | 22 (54) | 8 (36)  | 14 (64)  |
| 2-7                                                                             | 17 (41) | 4 (24)  | 13 (76)  |
| <b>Time since diagnosis of most recent primary melanoma (n= 36)<sup>4</sup></b> |         |         |          |
| ≤5 years                                                                        | 21 (58) | 8 (38)  | 13 (62)  |
| 5 to ≤10 years                                                                  | 11 (30) | 2 (18)  | 9 (82)   |
| ≥11 years                                                                       | 4 (12)  | 1 (25)  | 3 (75)   |
| <b>Time since diagnosis metastatic melanoma</b>                                 |         |         |          |
| ≤1 year                                                                         | 16 (39) | 10 (62) | 6 (37)   |
| 2 to 3 years                                                                    | 13 (32) | 0       | 13 (100) |
| ≥4 years                                                                        | 12 (29) | 3 (25)  | 9 (75)   |
| <b>Melanoma Stage</b>                                                           |         |         |          |
| Stage III                                                                       | 5 (12)  | 0 (0)   | 5 (100)  |
| Stage IV                                                                        | 36 (88) | 13 (36) | 23 (64)  |
| <b>Brain Metastasis</b>                                                         |         |         |          |
| Yes                                                                             | 9 (22)  | 4 (44)  | 5 (56)   |
| No                                                                              | 32 (78) |         | 23 (72)  |
|                                                                                 |         | 9 (28)  |          |
